# Supplementary material
Source: PubMed Central journal article supplement (PMC3829009)

**Supplementary figure 1.** A dose-dependent suppression of resistin-induced TNF- $\alpha$  production by inhibitors of NF- $\kappa$ B (A) and p38 MAPK (B) signalling

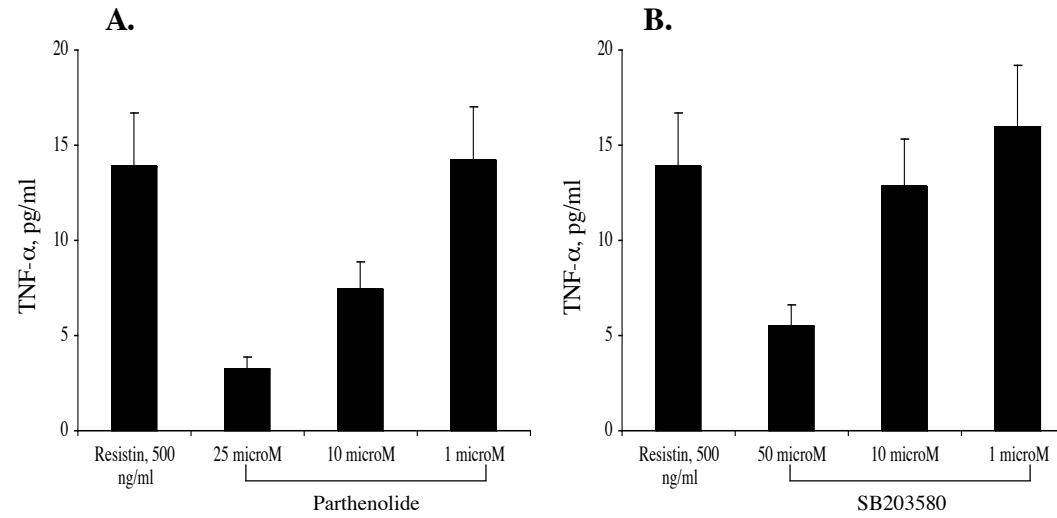

Supplement: jcmm0014-1419-SD1.pdf [file jcmm0014-1419-SD1.pdf]
